# Supplementary material
Source: MDPI journal article supplement (https://www.mdpi.com/1424-8247/14/12/1224)
Supplement: s1 [file s1]

**Table S1:** qPCR primers used for gene expression analysis

| Gene                               | Nucleotide Sequence            |
|------------------------------------|--------------------------------|
| <i><math>\beta</math>-actin-Fw</i> | 5'-GCAGAAGGAGATCACATCCCTGGC-3' |
| <i><math>\beta</math>-actin-Rv</i> | 5'-CATTGCCGTCACCTTCACCGTTC-3'  |
| <i>cnr1-Fw</i>                     | 5'- GACACCTGCGCGAACTATGT-3'    |
| <i>cnr1-Rv</i>                     | 5'- TCGTCGTAGCCGATGTCATT-3'    |
| <i>cnr2-Fw</i>                     | 5'- GTGGGAAGCCTTTTGCTGAC-3'    |
| <i>cnr2-Rv</i>                     | 5'- CTCCACCCCATCAAAGGGAG-3'    |
